# Supplementary material
Source: HighWire-hosted journal article supplement (https://jnm.snmjournals.org/highwire/filestream/95318/field_highwire_adjunct_files/0/211144_Supplemental_Data.pdf)
Supplement: 211144_Supplemental_Data.pdf [file 211144_Supplemental_Data.pdf]

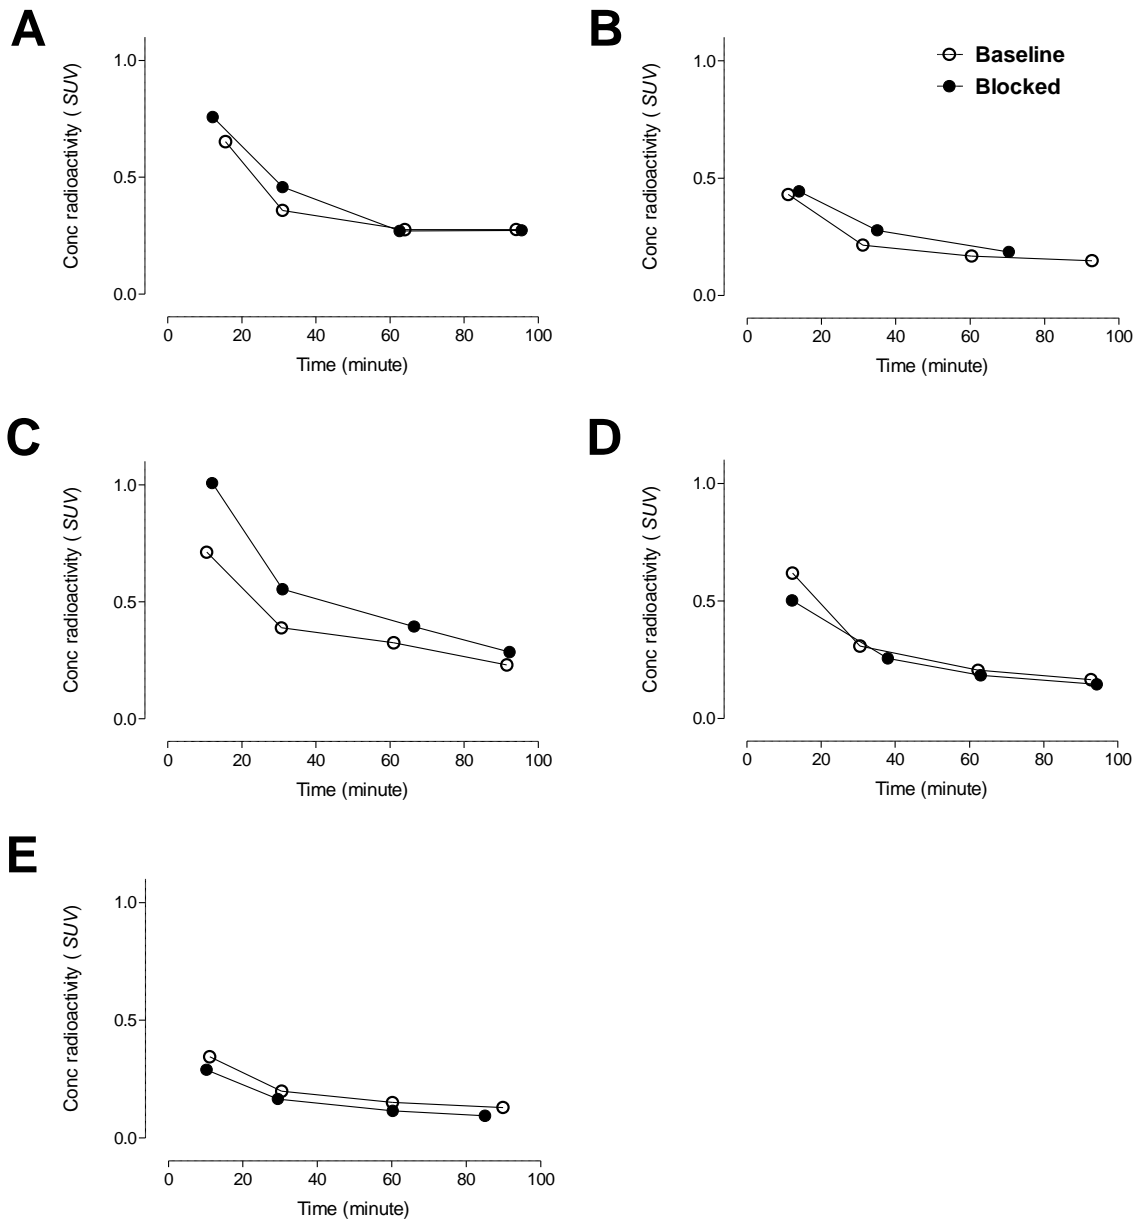

**Supplemental Figure 1.** Plasma levels of parent radioligand in each condition of the [ $^{11}\text{C}$ ]PS13 pre-blockade study. Each pair of plots represents baseline and blocked conditions by 1.0 mg/kg of PS13 (A), 3.0 mg/kg of ketoprofen (B), 11.1 mg/kg of aspirin (C), 3.0 mg/kg of MC1 (D), and 1.9 mg/kg of celecoxib (E). Conc = concentration.

**A**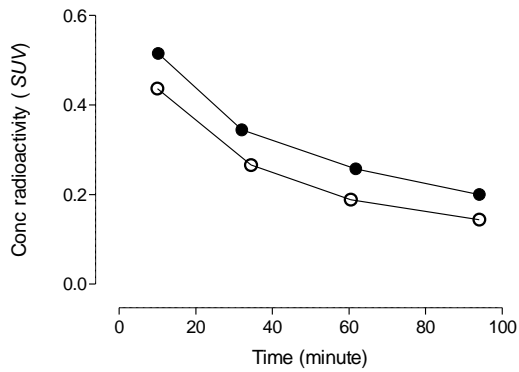**B**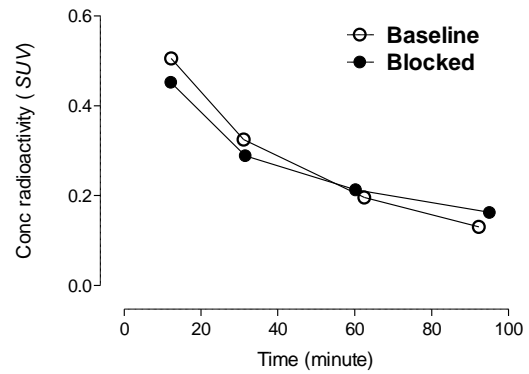**C**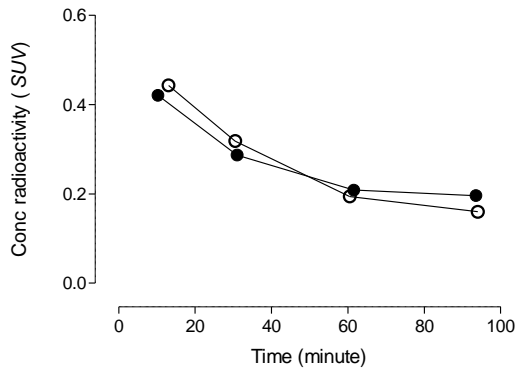**D**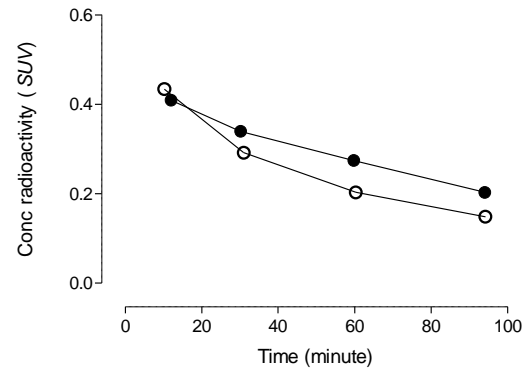

**Supplemental Figure 2.** Plasma levels of parent radioligand in each condition of the [ $^{11}\text{C}$ ]MC1 pre-blockade study. Each pair of plots represents baseline and blocked conditions by 3.0 mg/kg of PS13 (A), 22.2 mg/kg of aspirin (B), 0.3 mg/kg of MC1 (C), and 1.2 mg/kg of celecoxib (D). Conc = concentration.

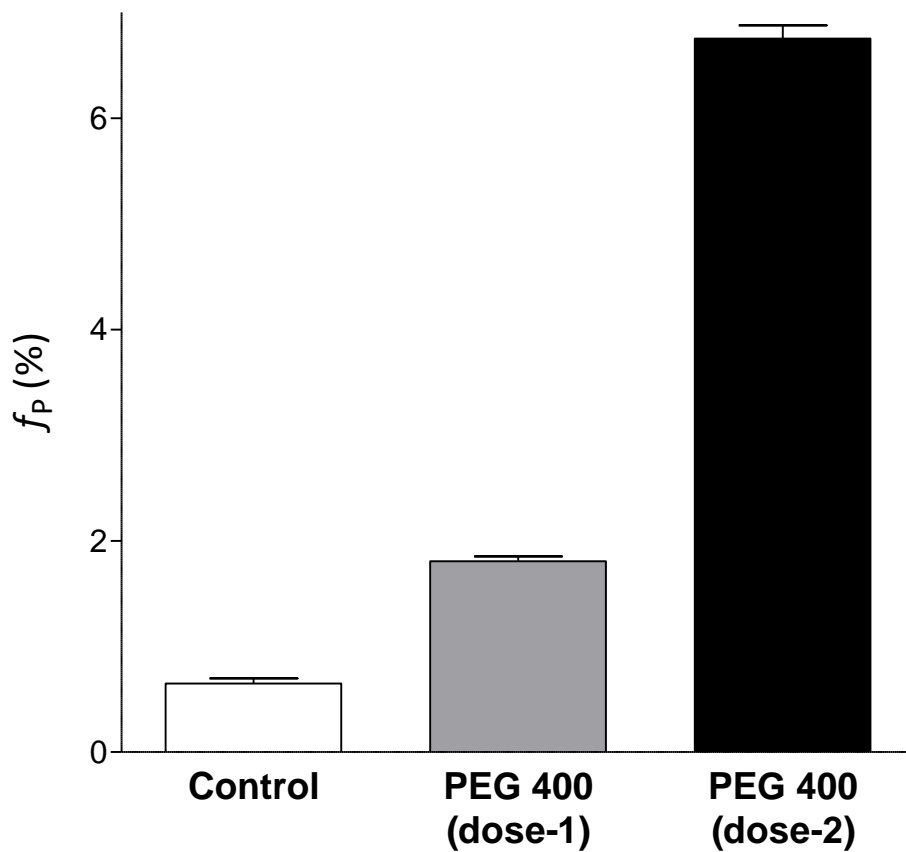

**Supplemental Figure 3.** The in vitro effects of polyethylene glycol (PEG) 400 on the plasma free fraction ( $f_P$ ) of [ $^{11}\text{C}$ ]MC1 in rat blood ( $n = 3$ ). When the concentration of PEG 400 was equal to that in the MC1 solution formulated as a pre-blocker (dose-1),  $f_P$  was more than twice as high than that of the control ( $P < 0.05$ ). When the concentration of PEG 400 was twice as high as in the pre-blocker solution (dose-2),  $f_P$  was more than 10 times higher than that of the control ( $P < 0.05$ ).
